# Supplementary material for: The analysis of per- and polyfluoroalkyl substances in wastewater sludges and biosolids: which adsorbents should be used for the cleanup of extracts?
Source: Royal Society of Chemistry journal article supplement (doi:10.1039/d2ew00617k), 2023-01-01
Supplement: d2ew00617k1.pdf [file d2ew00617k1.pdf]

**The Analysis of Per- and Polyfluoroalkyl Substances in  
Wastewater Sludges and Biosolids: Which Adsorbents  
Should be Used for  
the Cleanup of Extracts?**

**(Supporting Information)**

**Table S1.** LC/MS/MS operating condition and other information.

|                                  |                                                                                                   |                           |                                         |                           |                                 |
|----------------------------------|---------------------------------------------------------------------------------------------------|---------------------------|-----------------------------------------|---------------------------|---------------------------------|
| <b>Instrument</b>                | Shimadzu LCMS-8030 Triple Quadrupole Mass Spectrometer                                            |                           |                                         |                           |                                 |
| <b>Ionization</b>                | Negative electrospray                                                                             |                           |                                         |                           |                                 |
| <b>Precolumn</b>                 | Guard Column Thermo Scientific™ Acclaim 120 Å C18, 4.6 x 10 mm, 5 µm                              |                           |                                         |                           |                                 |
| <b>Column</b>                    | Agilent Infinity Lab Poroshell 120 Å EC-C18, 3.0 x 50 mm, 2.7 µm                                  |                           |                                         |                           |                                 |
| <b>Column oven temperature</b>   | 30°C                                                                                              |                           |                                         |                           |                                 |
| <b>Injection volume</b>          | 30 µL                                                                                             |                           |                                         |                           |                                 |
| <b>Mobile phases</b>             | A: 10 mM ammonium acetate in LCMS grade water<br>B: 10 mM ammonium acetate in LCMS grade Methanol |                           |                                         |                           |                                 |
| <b>Flow rate</b>                 | 0.5 mL/min                                                                                        |                           |                                         |                           |                                 |
| <b>Gradient profile</b>          | <b>Time (min)</b>                                                                                 | <b>Eluent A Conc. (%)</b> |                                         | <b>Eluent B Conc. (%)</b> |                                 |
|                                  | 0                                                                                                 | 60                        |                                         | 40                        |                                 |
|                                  | 0.5                                                                                               | 60                        |                                         | 40                        |                                 |
|                                  | 4.5                                                                                               | 20                        |                                         | 80                        |                                 |
|                                  | 10                                                                                                | 20                        |                                         | 80                        |                                 |
|                                  | 10.5                                                                                              | 60                        |                                         | 40                        |                                 |
|                                  | 13.5                                                                                              | Stop                      |                                         |                           |                                 |
| <b>Monitored ion transitions</b> | <b>Analytes</b>                                                                                   | <b>Ion transitions</b>    | <b>Internal standards</b>               | <b>Ion transitions</b>    | <b>Calibration range (µg/L)</b> |
|                                  | PFBA                                                                                              | 213 > 169                 | [ <sup>13</sup> C <sub>4</sub> ] MPFBA  | 217 > 172                 | 1 - 20                          |
|                                  | PFPeA                                                                                             | 263 > 219                 | [ <sup>13</sup> C <sub>5</sub> ] MPFPeA | 268 > 223                 | 1 - 20                          |
|                                  | PFHxA                                                                                             | 313 > 269                 | [ <sup>13</sup> C <sub>5</sub> ] MPFHxA | 318 > 273                 | 0.05 - 20                       |
|                                  | PFHpA                                                                                             | 463 > 319                 | [ <sup>13</sup> C <sub>4</sub> ] MPFHpA | 367 > 322                 | 0.05 - 20                       |
|                                  | PFOA                                                                                              | 413 > 369                 | [ <sup>13</sup> C <sub>8</sub> ] MPFOA  | 421 > 376                 | 0.05 - 20                       |
|                                  | PFNA                                                                                              | 463 > 419                 | [ <sup>13</sup> C <sub>9</sub> ] MPFNA  | 472 > 427                 | 0.05 - 20                       |
|                                  | PFDA                                                                                              | 513 > 469                 | [ <sup>13</sup> C <sub>6</sub> ] MPFDA  | 519 > 474                 | 0.05 - 20                       |

|                                          |         |           |                                  |          |           |           |
|------------------------------------------|---------|-----------|----------------------------------|----------|-----------|-----------|
| <b>Monitored<br/>ion<br/>transitions</b> | PFUdA   | 563 > 519 | [ <sup>13</sup> C <sub>7</sub> ] | MPFUdA   | 570 > 525 | 0.05 - 20 |
|                                          | PFDoA   | 613 > 569 | [ <sup>13</sup> C <sub>2</sub> ] | MPFDoA   | 615 > 570 | 0.05 - 20 |
|                                          | PFTTrDA | 663 > 619 | [ <sup>13</sup> C <sub>2</sub> ] | MPFTTeDA | 715 > 670 | 0.05 - 20 |
|                                          | PFTeDA  | 713 > 669 | [ <sup>13</sup> C <sub>2</sub> ] | MPFTeDA  | 715 > 670 | 0.05 - 20 |
|                                          | PFBS    | 299 > 80  | [ <sup>13</sup> C <sub>3</sub> ] | MPFBS    | 302 > 99  | 0.05 - 20 |
|                                          | PFPeS   | 349 > 80  | [ <sup>13</sup> C <sub>3</sub> ] | MPFBS    | 302 > 99  | 0.1 - 20  |
|                                          | PFHxS   | 399 > 80  | [ <sup>13</sup> C <sub>3</sub> ] | MPHxS    | 402 > 99  | 0.05 - 20 |
|                                          | PFHpS   | 449 > 80  | [ <sup>13</sup> C <sub>3</sub> ] | MPHxS    | 402 > 99  | 0.05 - 20 |
|                                          | PFOS    | 499 > 80  | [ <sup>13</sup> C <sub>8</sub> ] | MPFOS    | 507 > 99  | 0.05 - 20 |
|                                          | PFNS    | 549 > 80  | [ <sup>13</sup> C <sub>8</sub> ] | MPFOS    | 507 > 99  | 0.05 - 20 |
|                                          | PFDS    | 599 > 80  | [ <sup>13</sup> C <sub>8</sub> ] | MPFOS    | 507 > 99  | 0.05 - 20 |
|                                          | 4:2FTS  | 327 > 307 | [ <sup>13</sup> C <sub>2</sub> ] | M4:2FTS  | 329 > 81  | 0.05 - 20 |
|                                          | 6:2FTS  | 427 > 407 | [ <sup>13</sup> C <sub>2</sub> ] | M6:2FTS  | 429 > 81  | 0.05 - 20 |
|                                          | 8:2FTS  | 527 > 507 | [ <sup>13</sup> C <sub>2</sub> ] | M8:2FTS  | 529 > 81  | 0.05 - 20 |
|                                          | FOSA    | 498 > 78  | [ <sup>13</sup> C <sub>8</sub> ] | MFOSA    | 506 > 78  | 0.05 - 20 |
|                                          | MeFOSAA | 570 > 419 | [ <sup>2</sup> d <sub>2</sub> ]  | MMeFOSAA | 573 > 419 | 0.05 - 20 |
|                                          | EtFOSAA | 584 > 419 | [ <sup>2</sup> d <sub>2</sub> ]  | MEtFOSAA | 589 > 419 | 0.05 - 20 |

**Table S2.** Limit of Quantitation (LOQ). Seven Ottawa sand samples (0.5 g/sample) were spiked with native PFAS (2 ng each) and isotopically labeled PFAS (1 ng each), and the spiked samples were extracted and analyzed. The standard deviation (SD) of the analyzed PFAS concentrations was calculated based on these 7 samples, and the limit of quantitation (LOQ) for each PFAS was calculated as  $LOQ = 10 \times SD$ . The values should be considered as the “best-case-scenario” LOQ. Since the background organics eluted in the extraction step could affect chromatogram quality, LOQ would vary among biosolid samples. The LOQ of 6:2 FTS is not reported due to cross contamination in some samples.

|                | <b>LOQ<br/>(ng/g dry weight)</b> |
|----------------|----------------------------------|
| <b>PFBA</b>    | 0.5                              |
| <b>PFPeA</b>   | 1.5                              |
| <b>PFHxA</b>   | 0.1                              |
| <b>PFHpA</b>   | 0.1                              |
| <b>PFOA</b>    | 0.1                              |
| <b>PFNA</b>    | 0.1                              |
| <b>PFDA</b>    | 0.1                              |
| <b>PFUdA</b>   | 0.5                              |
| <b>PFDoA</b>   | 0.5                              |
| <b>PFTrDA</b>  | 1.0                              |
| <b>PFTeDA</b>  | 1.0                              |
| <b>PFBS</b>    | 0.5                              |
| <b>PFPeS</b>   | 0.5                              |
| <b>PFHxS</b>   | 0.1                              |
| <b>PFHpS</b>   | 0.1                              |
| <b>PFOS</b>    | 0.1                              |
| <b>PFNS</b>    | 0.5                              |
| <b>PFDS</b>    | 0.5                              |
| <b>4:2 FTS</b> | 0.5                              |
| <b>6:2 FTS</b> | -                                |
| <b>8:2 FTS</b> | 0.5                              |
| <b>FOSA</b>    | 0.5                              |
| <b>MeFOSAA</b> | 1.0                              |
| <b>EtFOSAA</b> | 1.0                              |

**Table S3.** Recovery values for native and isotopically labeled PFAS. Biosolid 1 and Biosolid 4 were spiked with both native PFAS (5 ng/compound) and isotopically labeled PFAS (2 ng/compound), and the spiked samples were extracted and analyzed.

**Biosolid 1**

| <b>Analytes</b> | <b>Recovery</b> | <b>Internal standards</b>                | <b>Recovery</b> | <b>p</b> |
|-----------------|-----------------|------------------------------------------|-----------------|----------|
| <b>PFBA</b>     | 95 ± 4          | [ <sup>13</sup> C <sub>4</sub> ] MPFBA   | 87 ± 4          | 0.07     |
| <b>PFPeA</b>    | 95 ± 6          | [ <sup>13</sup> C <sub>5</sub> ] MPFPeA  | 92 ± 5          | 0.50     |
| <b>PFHxA</b>    | 97 ± 7          | [ <sup>13</sup> C <sub>5</sub> ] MPFHxA  | 101 ± 4         | 0.29     |
| <b>PFHpA</b>    | 108 ± 5         | [ <sup>13</sup> C <sub>4</sub> ] MPFHpA  | 112 ± 2         | 0.30     |
| <b>PFOA</b>     | 102 ± 3         | [ <sup>13</sup> C <sub>8</sub> ] MPFOA   | 108 ± 3         | 0.10     |
| <b>PFNA</b>     | 137 ± 6         | [ <sup>13</sup> C <sub>9</sub> ] MPFNA   | 130 ± 8         | 0.28     |
| <b>PFDA</b>     | 160 ± 11        | [ <sup>13</sup> C <sub>6</sub> ] MPFDA   | 156 ± 10        | 0.62     |
| <b>PFUdA</b>    | 109 ± 6         | [ <sup>13</sup> C <sub>7</sub> ] MPFUdA  | 117 ± 7         | 0.09     |
| <b>PFDoA</b>    | 95 ± 4          | [ <sup>13</sup> C <sub>2</sub> ] MPFDoA  | 85 ± 5          | 0.08     |
| <b>PFTrDA</b>   | 85 ± 5          | [ <sup>13</sup> C <sub>2</sub> ] MPFTrDA | 74 ± 4          | 0.05     |
| <b>PFTeDA</b>   | 80 ± 5          | [ <sup>13</sup> C <sub>2</sub> ] MPFTeDA | 74 ± 4          | 0.14     |
| <b>PFBS</b>     | 78 ± 5          | [ <sup>13</sup> C <sub>3</sub> ] MPFBS   | 84 ± 3          | 0.17     |
| <b>PFPeS</b>    | 90 ± 4          | [ <sup>13</sup> C <sub>3</sub> ] MPFBS   | 84 ± 3          | 0.17     |
| <b>PFHxS</b>    | 96 ± 6          | [ <sup>13</sup> C <sub>3</sub> ] MPHxS   | 91 ± 3          | 0.21     |
| <b>PFHpS</b>    | 94 ± 4          | [ <sup>13</sup> C <sub>3</sub> ] MPHxS   | 91 ± 3          | 0.25     |
| <b>PFOS</b>     | 93 ± 3          | [ <sup>13</sup> C <sub>8</sub> ] MPFOS   | 93 ± 2          | 1.00     |
| <b>PFNS</b>     | 98 ± 5          | [ <sup>13</sup> C <sub>8</sub> ] MPFOS   | 93 ± 2          | 0.22     |
| <b>PFDS</b>     | 100 ± 9         | [ <sup>13</sup> C <sub>8</sub> ] MPFOS   | 93 ± 2          | 0.38     |
| <b>4:2FTS</b>   | 215 ± 12        | [ <sup>13</sup> C <sub>2</sub> ] M4:2FTS | 190 ± 10        | 0.05     |
| <b>6:2FTS</b>   |                 | [ <sup>13</sup> C <sub>2</sub> ] M6:2FTS | 410 ± 20        |          |
| <b>8:2FTS</b>   | 325 ± 13        | [ <sup>13</sup> C <sub>2</sub> ] M8:2FTS | 298 ± 13        | 0.05     |
| <b>FOSA</b>     | 100 ± 5         | [ <sup>13</sup> C <sub>8</sub> ] MFOSA   | 107 ± 4         | 0.11     |
| <b>MeFOSAA</b>  | 137 ± 6         | [ <sup>2</sup> d <sub>2</sub> ]MMeFOSAA  | 134 ± 3         | 0.58     |
| <b>EtFOSAA</b>  | 138 ± 7         | [ <sup>2</sup> d <sub>2</sub> ]MEtFOSAA  | 144 ± 3         | 0.14     |

**Biosolid 4**

| <b>Analytes</b> | <b>Recovery</b> | <b>Internal standards</b>                | <b>Recovery</b> | <b>p</b> |
|-----------------|-----------------|------------------------------------------|-----------------|----------|
| <b>PFBA</b>     | 86 ± 6          | [ <sup>13</sup> C <sub>4</sub> ] MPFBA   | 81 ± 5          | 0.28     |
| <b>PFPeA</b>    | 89 ± 4          | [ <sup>13</sup> C <sub>5</sub> ] MPFPeA  | 93 ± 2          | 0.25     |
| <b>PFHxA</b>    | 109 ± 4         | [ <sup>13</sup> C <sub>5</sub> ] MPFHxA  | 111 ± 3         | 0.41     |
| <b>PFHpA</b>    | 125 ± 5         | [ <sup>13</sup> C <sub>4</sub> ] MPFHpA  | 128 ± 3         | 0.49     |
| <b>PFOA</b>     | 134 ± 4         | [ <sup>13</sup> C <sub>8</sub> ] MPFOA   | 133 ± 2         | 0.70     |
| <b>PFNA</b>     | 156 ± 7         | [ <sup>13</sup> C <sub>9</sub> ] MPFNA   | 152 ± 3         | 0.37     |
| <b>PFDA</b>     | 181 ± 6         | [ <sup>13</sup> C <sub>6</sub> ] MPFDA   | 175 ± 3         | 0.23     |
| <b>PFUdA</b>    | 158 ± 7         | [ <sup>13</sup> C <sub>7</sub> ] MPFUdA  | 164 ± 5         | 0.25     |
| <b>PFDoA</b>    | 141 ± 5         | [ <sup>13</sup> C <sub>2</sub> ] MPFDoA  | 142 ± 3         | 0.85     |
| <b>PFTeDA</b>   | 66 ± 4          | [ <sup>13</sup> C <sub>2</sub> ] MPFTeDA | 68 ± 6          | 0.60     |
| <b>PFTeDA</b>   | 74 ± 3          | [ <sup>13</sup> C <sub>2</sub> ] MPFTeDA | 68 ± 6          | 0.26     |
| <b>PFBS</b>     | 116 ± 7         | [ <sup>13</sup> C <sub>3</sub> ] MPFBS   | 115 ± 4         | 0.78     |
| <b>PFPeS</b>    | 111 ± 7         | [ <sup>13</sup> C <sub>3</sub> ] MPFBS   | 115 ± 4         | 0.43     |
| <b>PFHxS</b>    | 109 ± 6         | [ <sup>13</sup> C <sub>3</sub> ] MPHxS   | 114 ± 5         | 0.27     |
| <b>PFHpS</b>    | 119 ± 4         | [ <sup>13</sup> C <sub>3</sub> ] MPHxS   | 114 ± 5         | 0.29     |
| <b>PFOS</b>     | 105 ± 5         | [ <sup>13</sup> C <sub>8</sub> ] MPFOS   | 110 ± 4         | 0.21     |
| <b>PFNS</b>     | 101 ± 6         | [ <sup>13</sup> C <sub>8</sub> ] MPFOS   | 110 ± 4         | 0.10     |
| <b>PFDS</b>     | 104 ± 5         | [ <sup>13</sup> C <sub>8</sub> ] MPFOS   | 110 ± 4         | 0.16     |
| <b>4:2FTS</b>   | 232 ± 14        | [ <sup>13</sup> C <sub>2</sub> ] M4:2FTS | 210 ± 10        | 0.06     |
| <b>6:2FTS</b>   |                 | [ <sup>13</sup> C <sub>2</sub> ] M6:2FTS | 399 ± 10        |          |
| <b>8:2FTS</b>   | 369 ± 13        | [ <sup>13</sup> C <sub>2</sub> ] M8:2FTS | 400 ± 20        | 0.05     |
| <b>FOSA</b>     | 97 ± 3          | [ <sup>13</sup> C <sub>8</sub> ] MFOSA   | 100 ± 3         | 0.26     |
| <b>MeFOSAA</b>  | 121 ± 5         | [ <sup>2</sup> d <sub>2</sub> ]MMeFOSAA  | 129 ± 3         | 0.11     |
| <b>EtFOSAA</b>  | 156 ± 6         | [ <sup>2</sup> d <sub>2</sub> ]MEtFOSAA  | 170 ± 10        | 0.13     |

**Extract of Biosolid 1 cleaned with ENVI-Carb + WAX and subsequently spiked with a mixture of 24 native PFAS (2.5 ng/mL)**

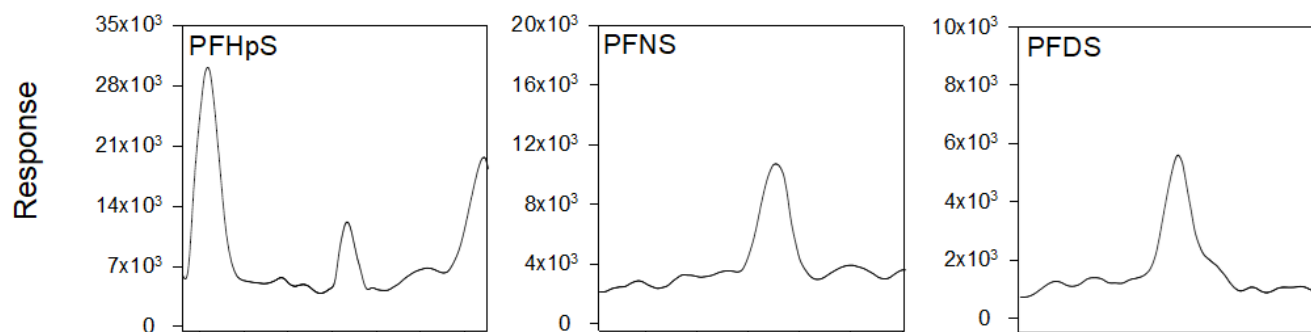

**Extract of Biosolid 1 cleaned with ENVI-Carb + PSA + C18 and subsequently spiked with a mixture of 24 native PFAS (2.5 ng/mL)**

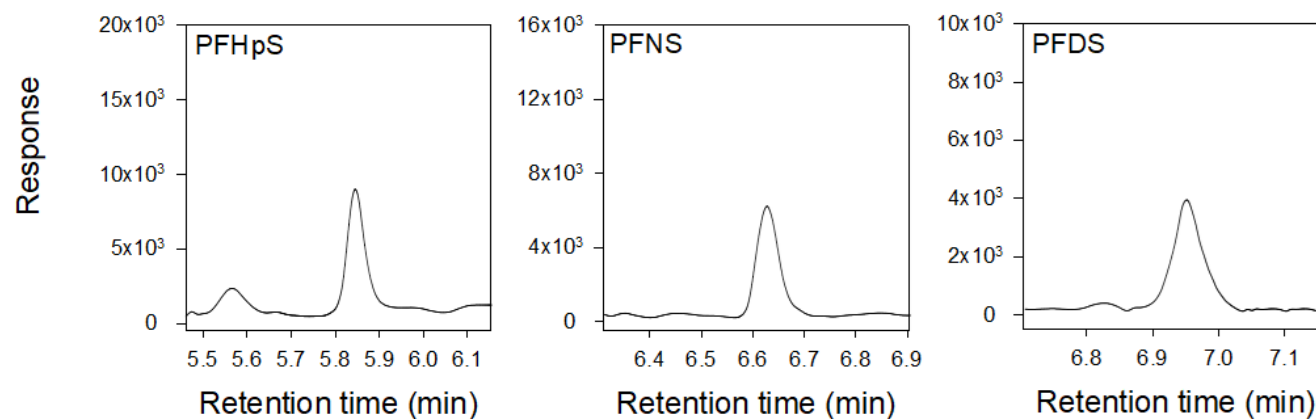

**Figure S1-A.** Chromatograms of perfluoro sulfonates in the Biosolid 1 extract cleaned with ENVI-Carb and WAX (top panels) and with a blend of ENVI-Carb, PSA, and C18 (bottom panels). These compounds were not present in Biosolid 1. Thus, the compounds were added to the cleaned-up extract prior to LC/MS/MS analysis.

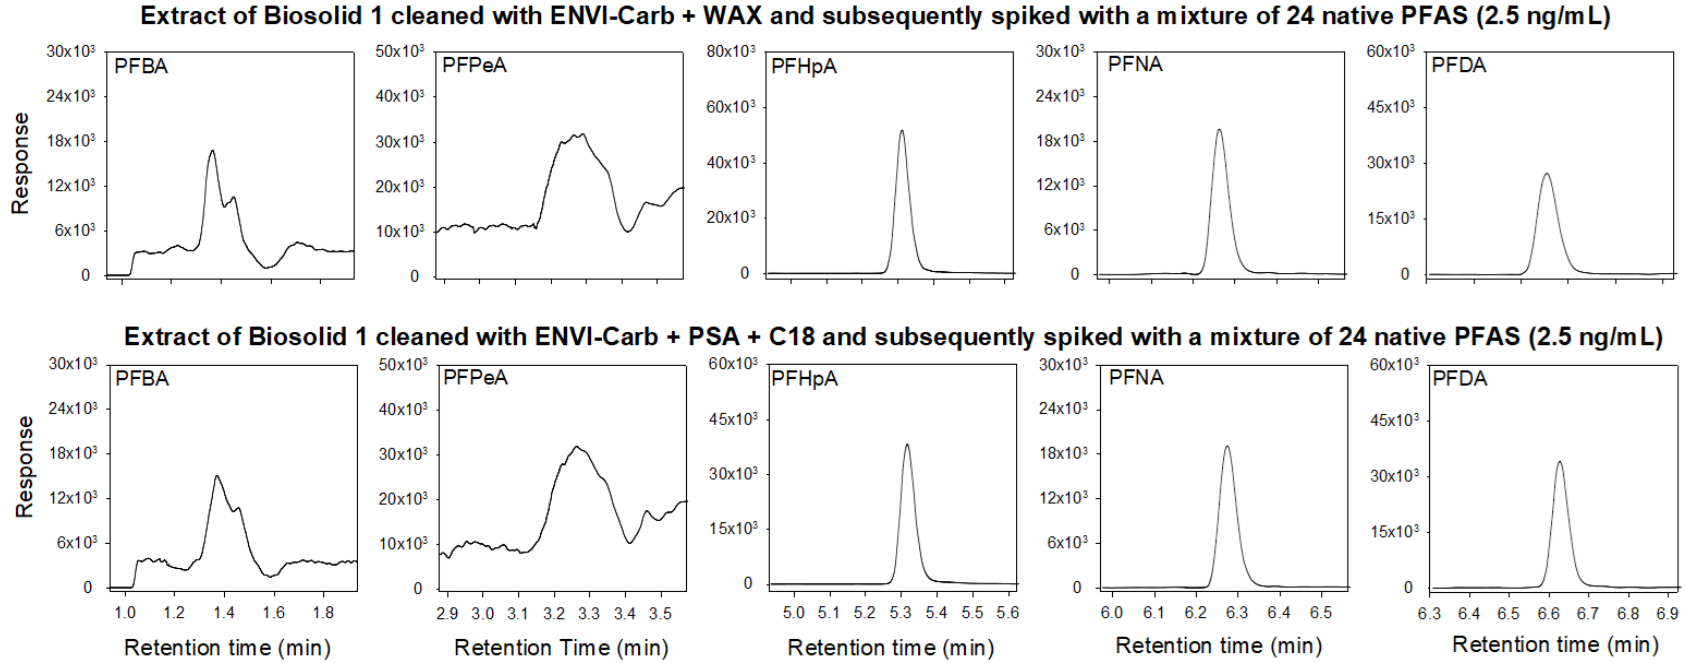

**Figure S1-B.** Chromatograms of other PFCAs in the Biosolid 1 extract cleaned with ENVI-Carb and WAX (top panels) and with a blend of ENVI-Carb, PSA, and C18 (bottom panels). The cleaned-up extracts were spiked prior to LC/MS/MS analysis.



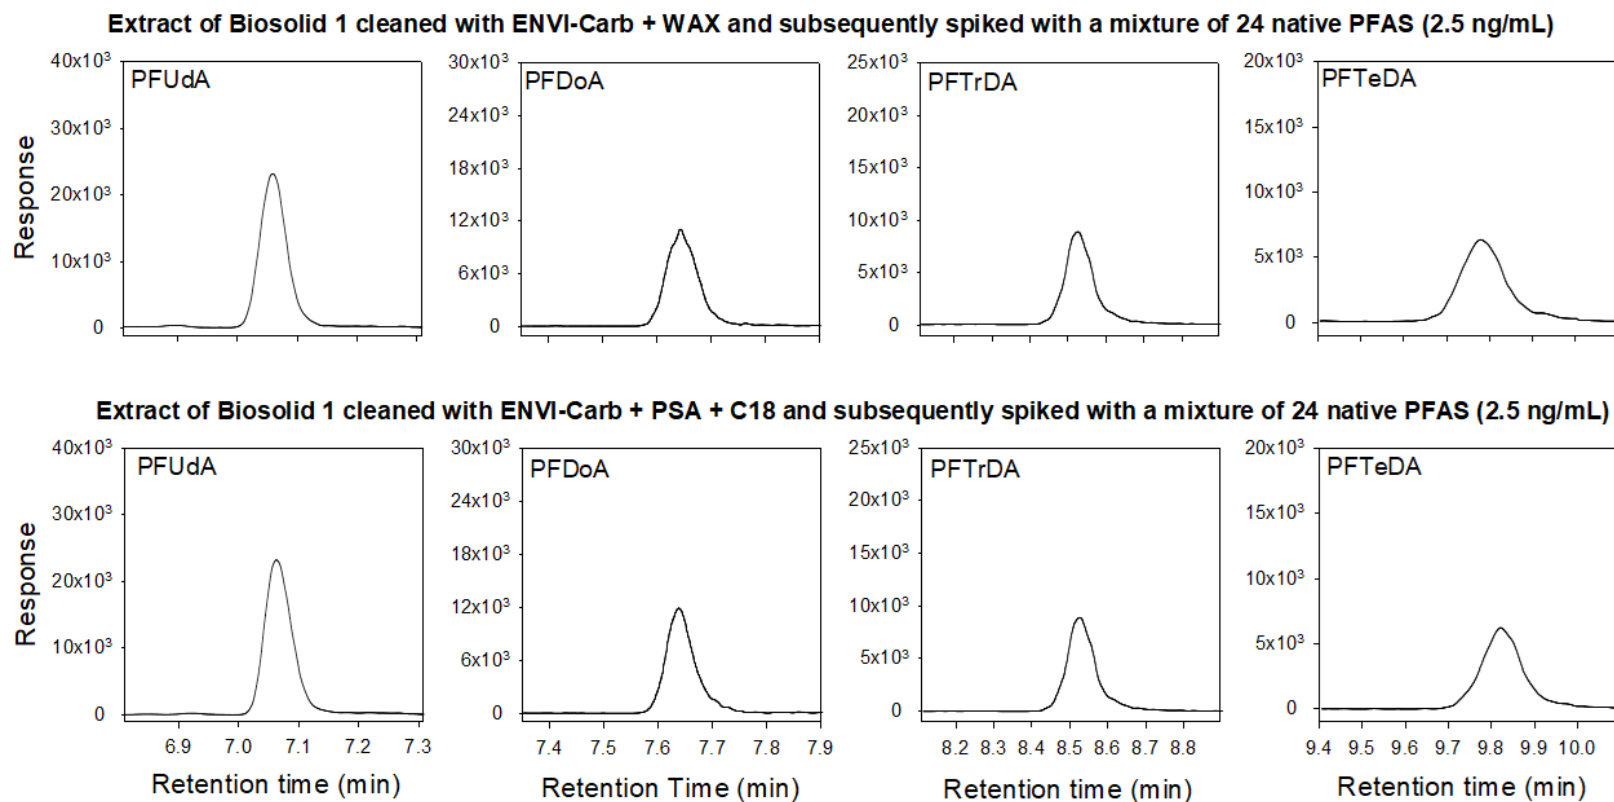

**Figure S1-B cont'd.** Chromatograms of other PFCAs in the Biosolid 1 extract cleaned with ENVI-Carb and WAX (top panels) and with a blend of ENVI-Carb, PSA, and C18 (bottom panels). The cleaned-up extracts were spiked prior to LC/MS/MS analysis.

**Extract of Biosolid 1 cleaned with ENVI-Carb + WAX and subsequently spiked with a mixture of 24 native PFAS (2.5 ng/mL)**

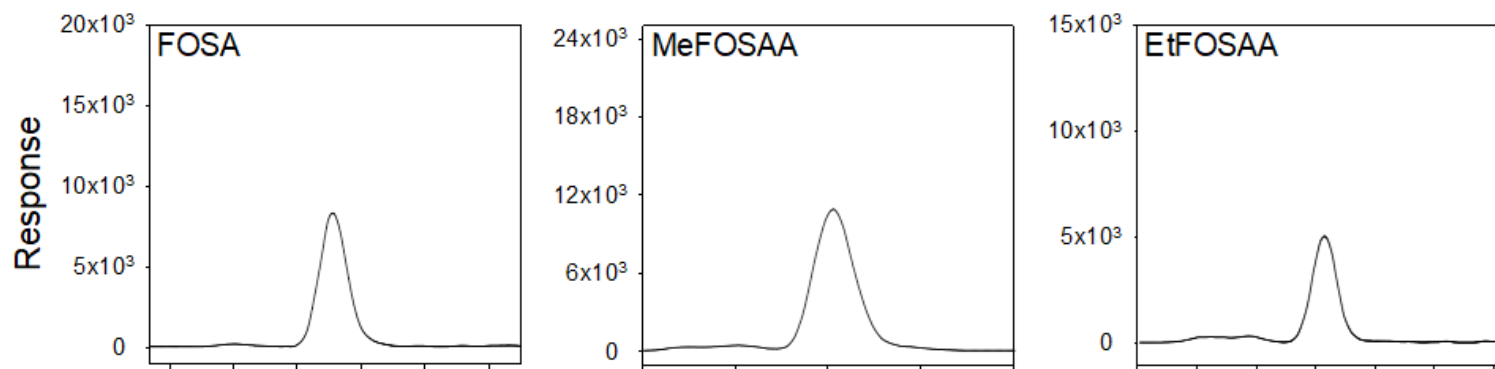

**Extract of Biosolid 1 cleaned with ENVI-Carb + PSA + C18 and subsequently spiked with a mixture of 24 native PFAS (2.5 ng/mL)**

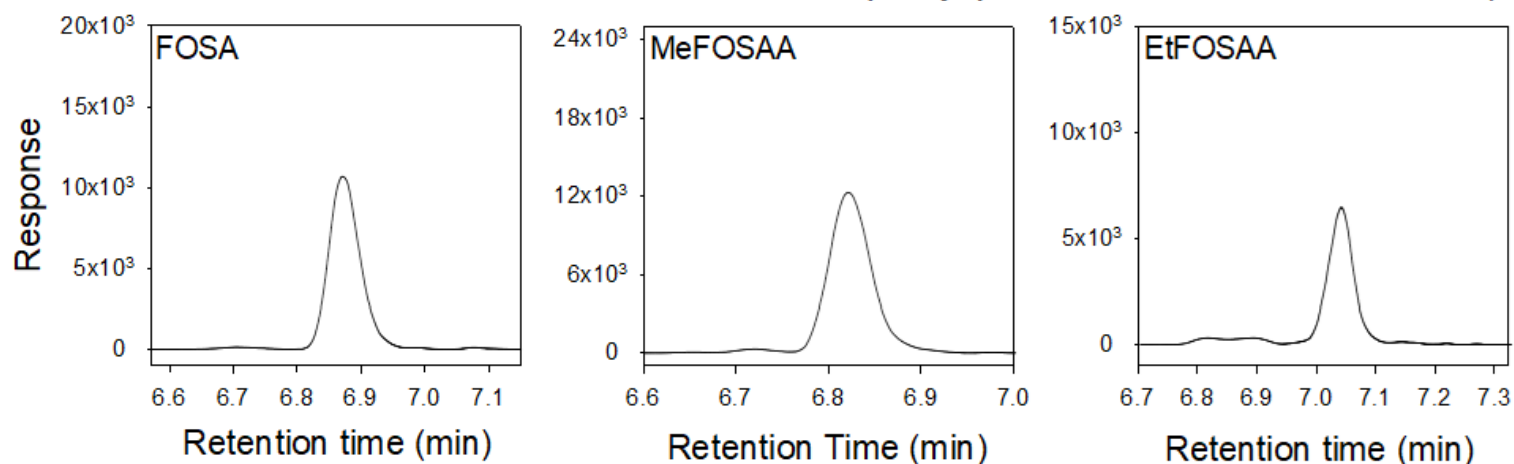

**Figure S1-C.** Chromatograms of precursors in the Biosolid 1 extract cleaned with ENVI-Carb and WAX (top panels) and with a blend of ENVI-Carb, PSA, and C18 (bottom panels). The cleaned-up extracts were spiked prior to LC/MS/MS analysis.

**Photo A**

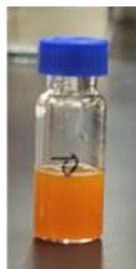

**Biosolid 1  
1g PSA**

**Photo B**

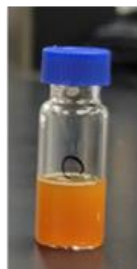

**Biosolid 1  
1g C18**

**Photo C**

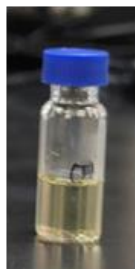

**Biosolid 1  
1g ENVI-Carb**

**Photo D**

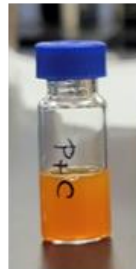

**Biosolid 1  
1g PSA  
1g C18**

**Photo E**

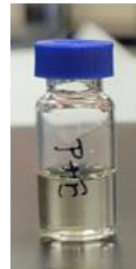

**Biosolid 1  
1g ENVI-Carb  
1g PSA**

**Photo F**

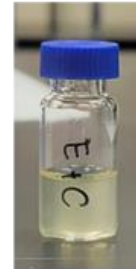

**Biosolid 1  
1g ENVI-Carb  
1g C18**

**Photo G**

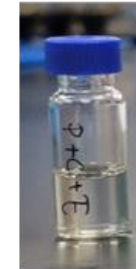

**Biosolid 1  
1g ENVI-Carb  
1g PSA  
1g C18**

**Figure S2.** Photos A, B, C, D, E, F and G present the physical appearance of the Biosolid 1 extract cleaned with various adsorbents specified below each photo.

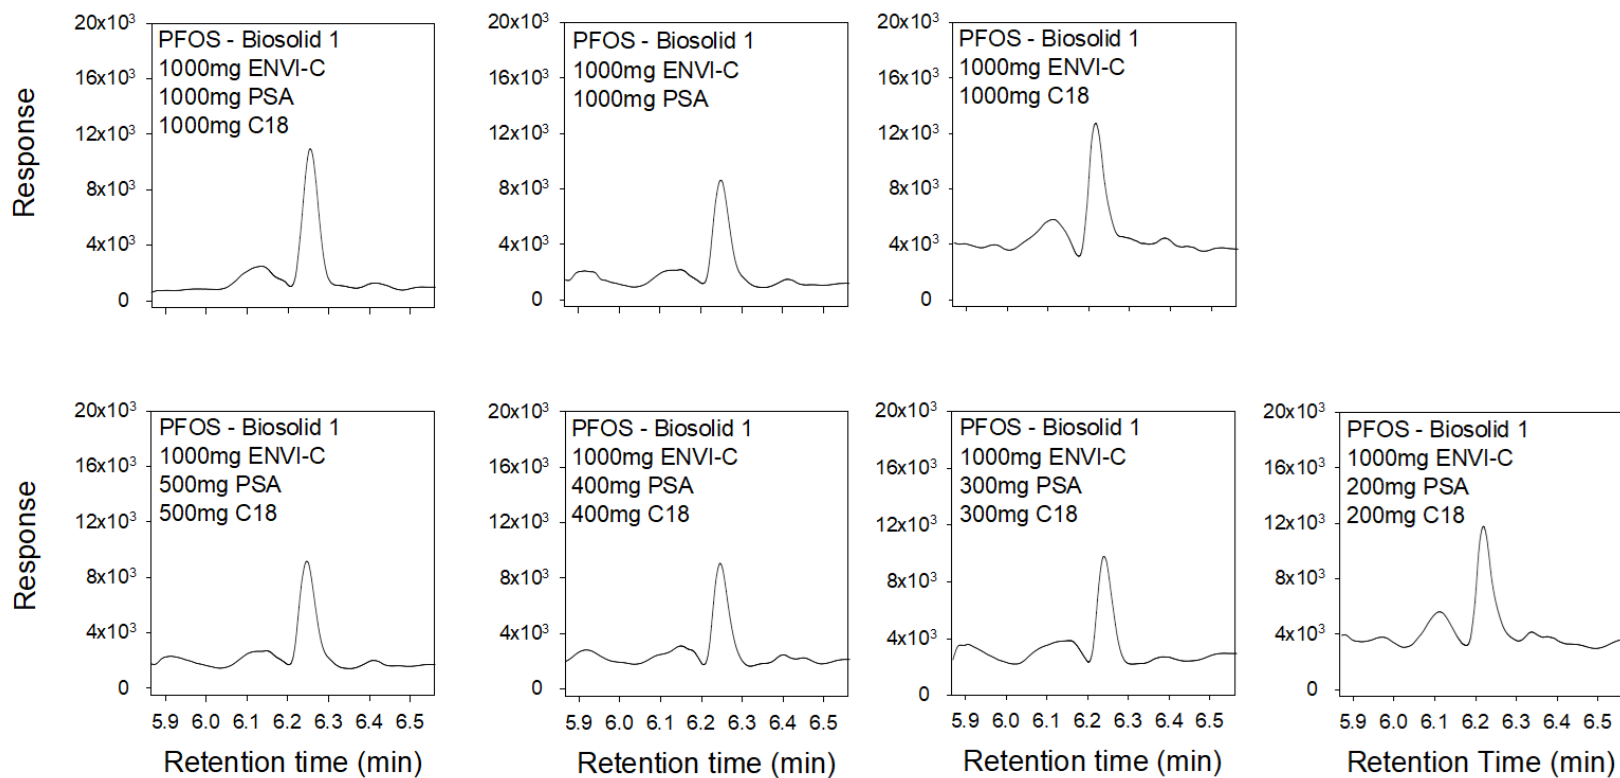

**Figure S3.** Chromatograms of PFOS in the Biosolid 1 extract cleaned with blends of ENVI-Carb, PSA, and C18.

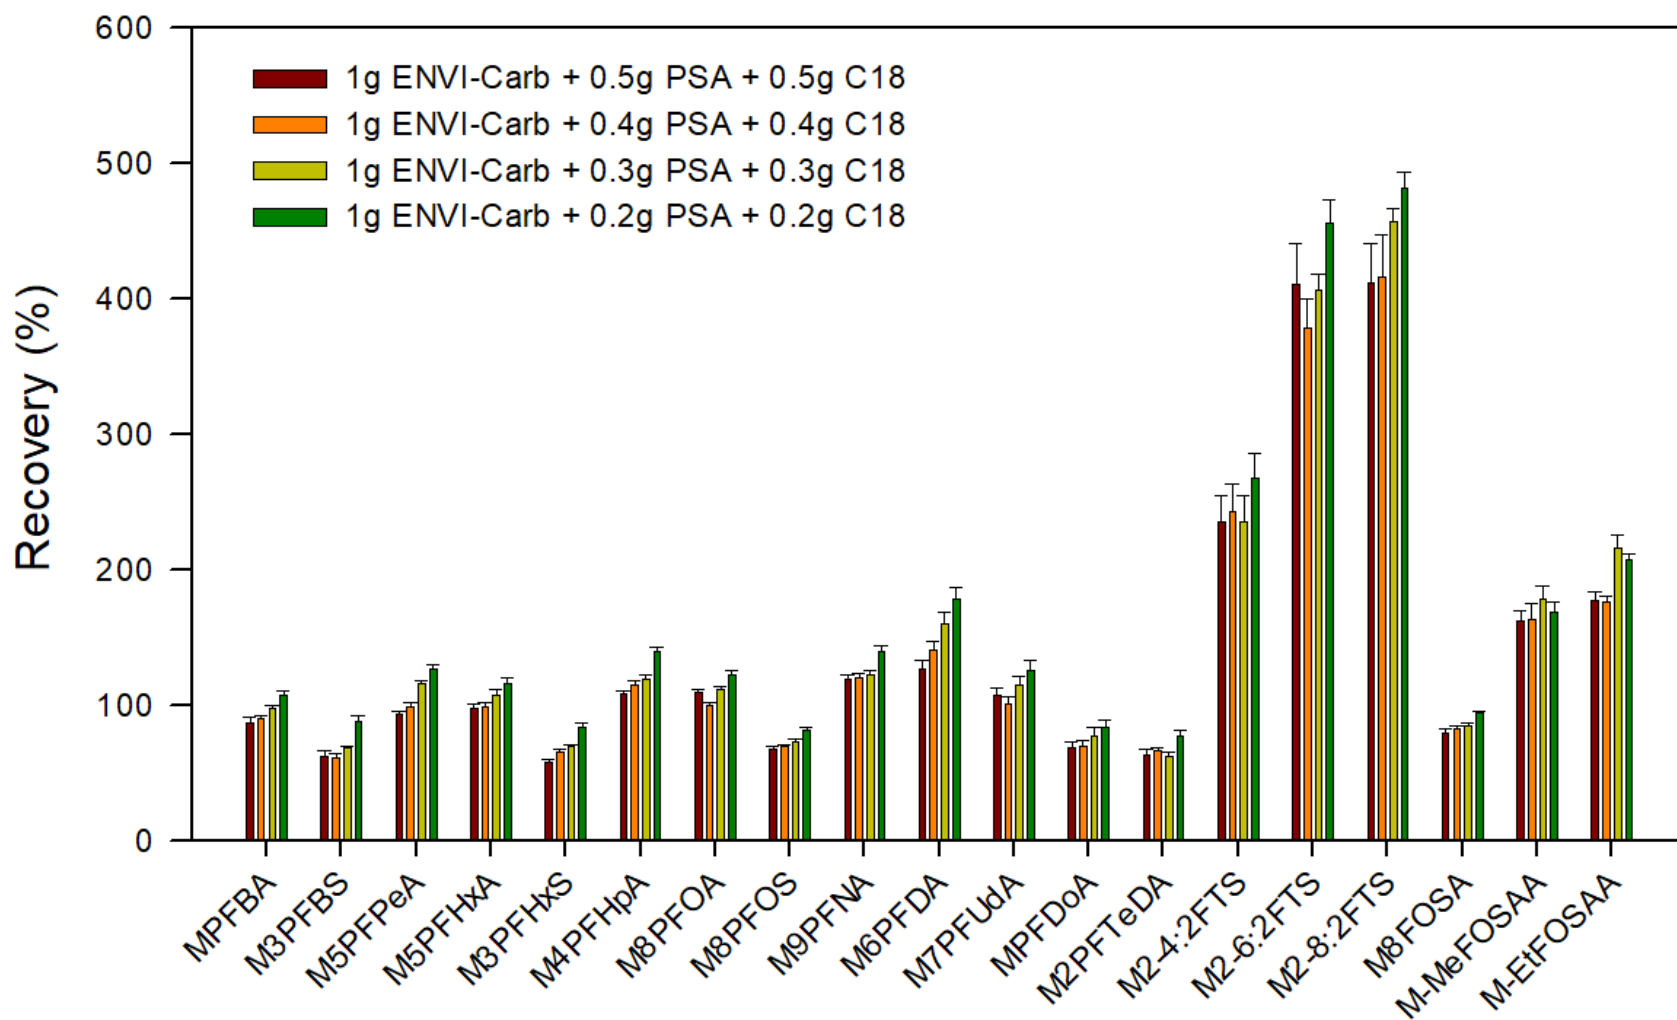

**Figure S4.** Mean Recovery Values (n=3) of mass-labelled PFAS of Biosolid 1 cleaned with 1g ENVI-Carb and various amounts of PSA and C18.

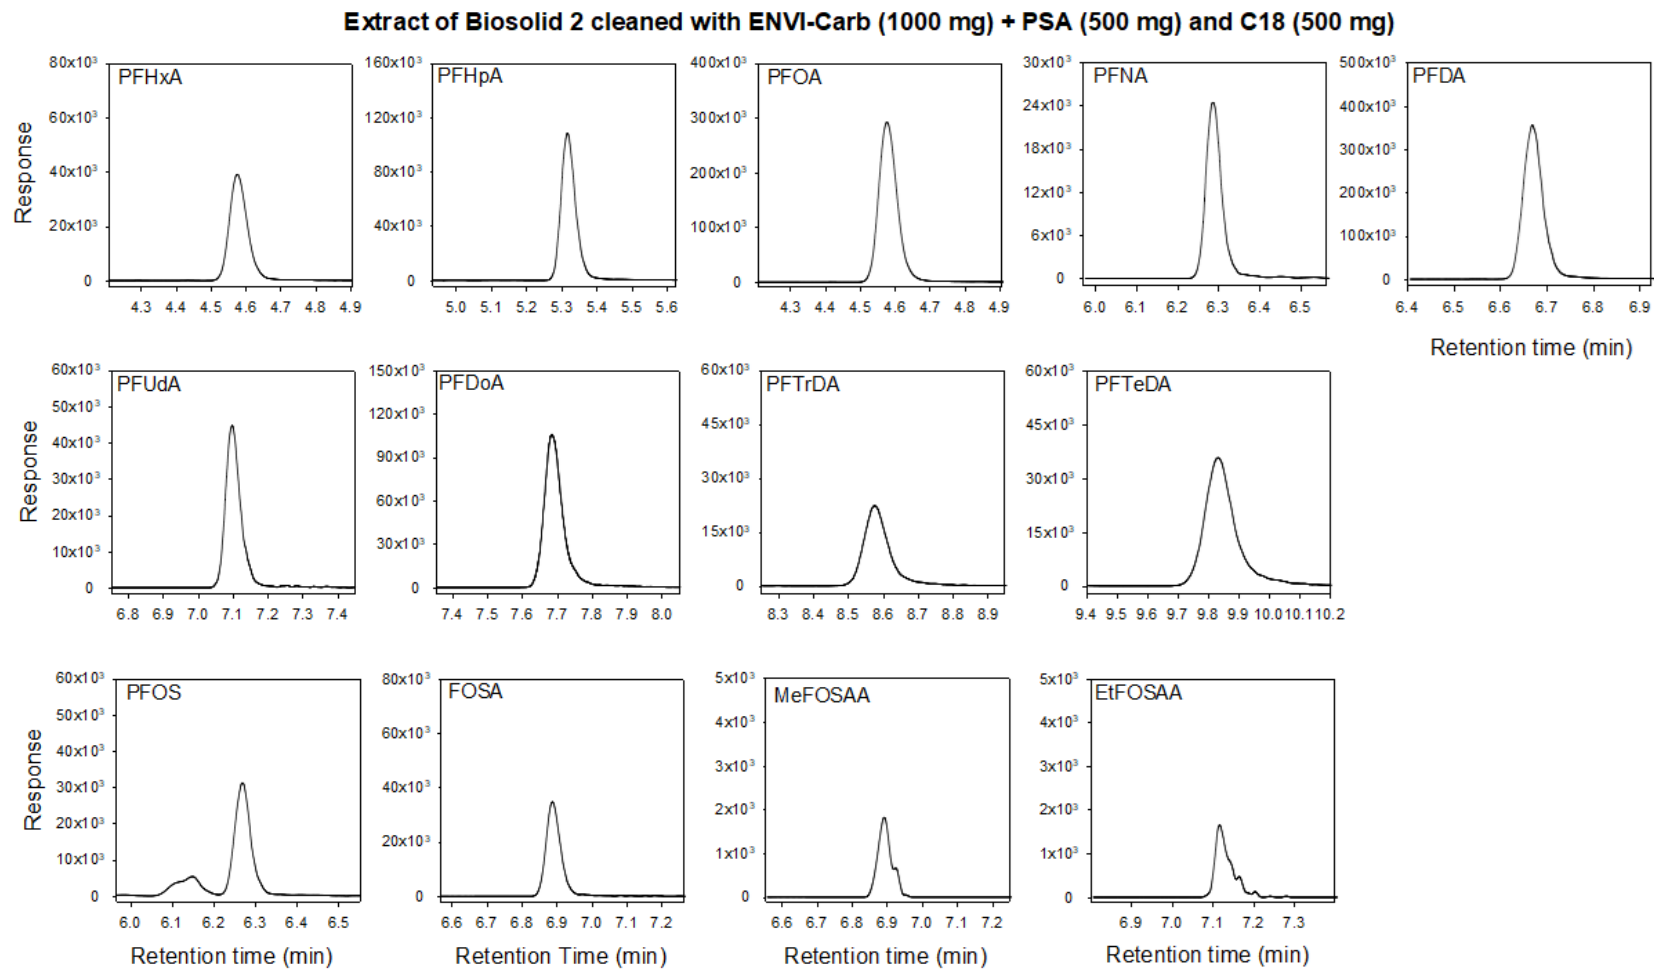

**Figure S5-A.** Chromatograms of all PFASs in the Biosolid 2 extract cleaned with ENVI-Carb (1000 mg), PSA (500 mg) and C18 (500 mg)

Extract of Biosolid 3 cleaned with ENVI-Carb (1000 mg) + PSA (500 mg) and C18 (500 mg)

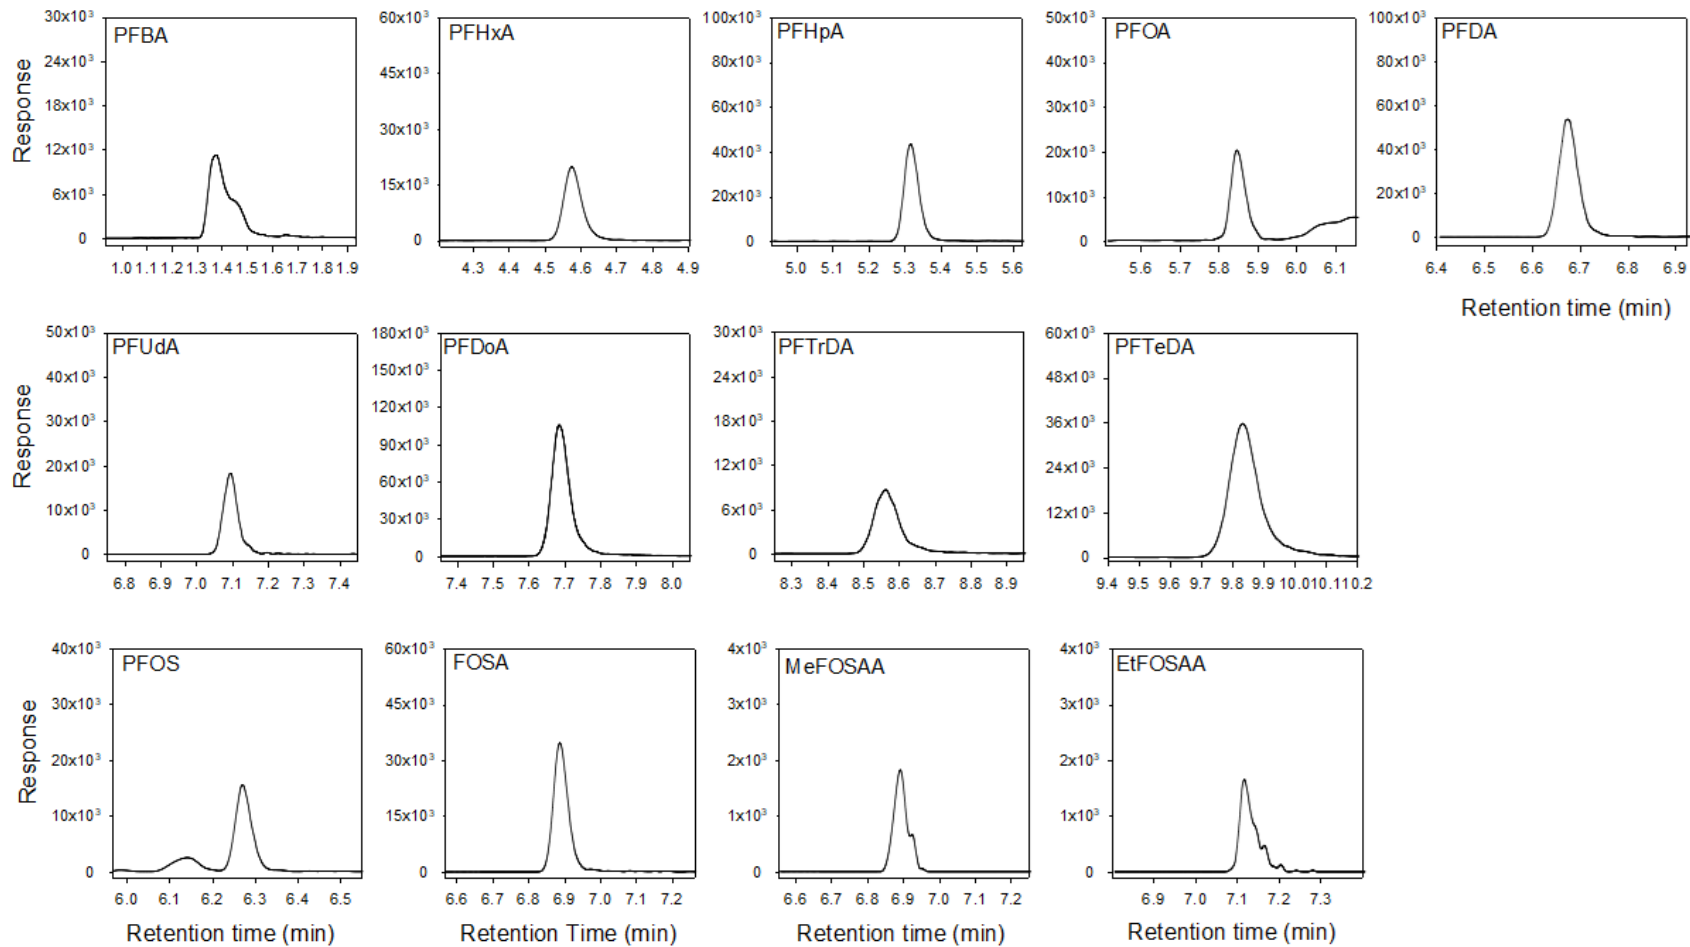

Figure S5-B. Chromatograms of all PFASs in the Biosolid 3 extract cleaned with ENVI-Carb (1000 mg), PSA (500 mg) and C18 (500 mg)

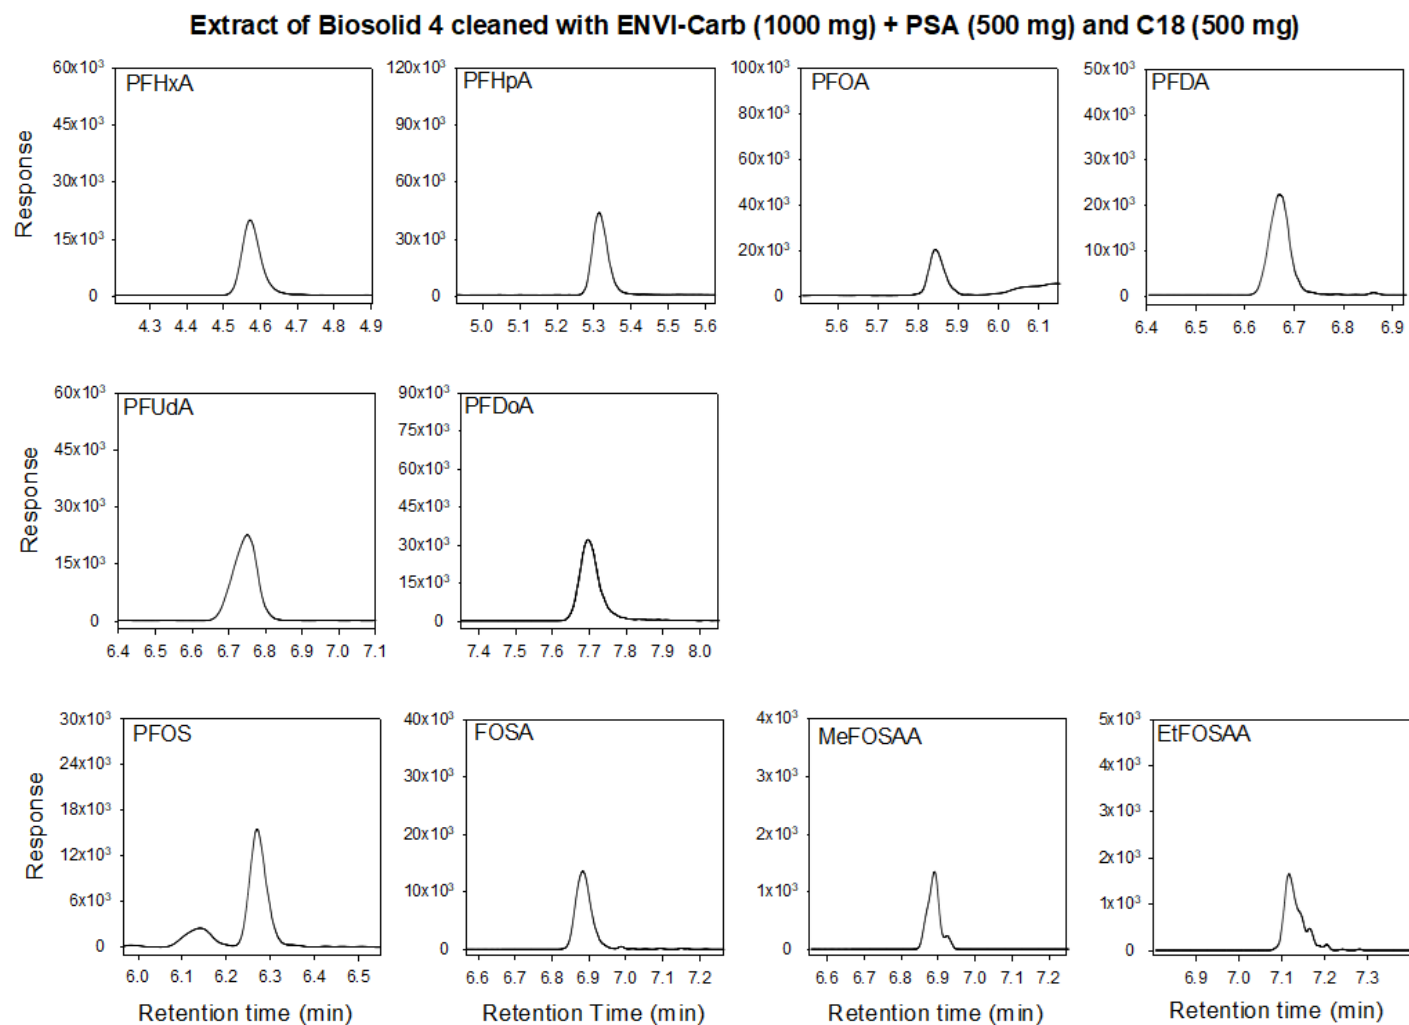

**Figure S5-C.** Chromatograms of all PFASs in the Biosolid 4 extract cleaned with ENVI-Carb (1000 mg), PSA (500 mg) and C18 (500 mg)



**Extract of Biosolid 5 cleaned with ENVI-Carb (1000 mg) + PSA (500 mg) and C18 (500 mg)**

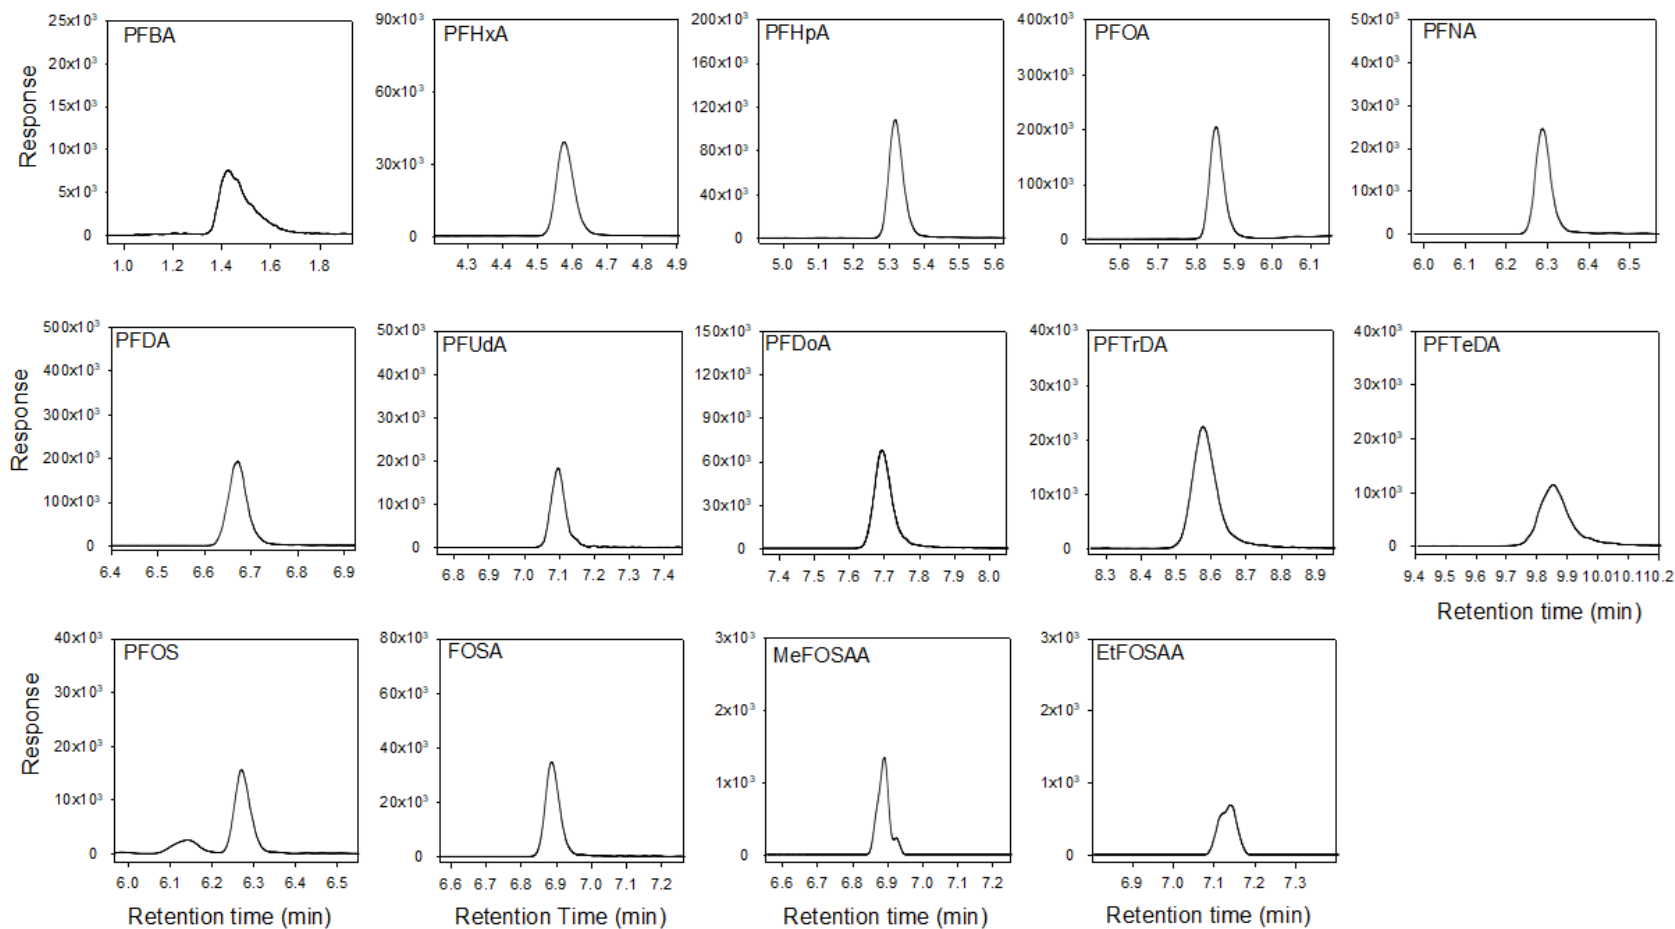

**Figure S5-D.** Chromatograms of all PFASs in the Biosolid 5 extract cleaned with ENVI-Carb (1000 mg), PSA (500 mg) and C18 (500 mg)

**Extract of Biosolid 6 cleaned with ENVI-Carb (1000 mg) + PSA (500 mg) and C18 (500 mg)**

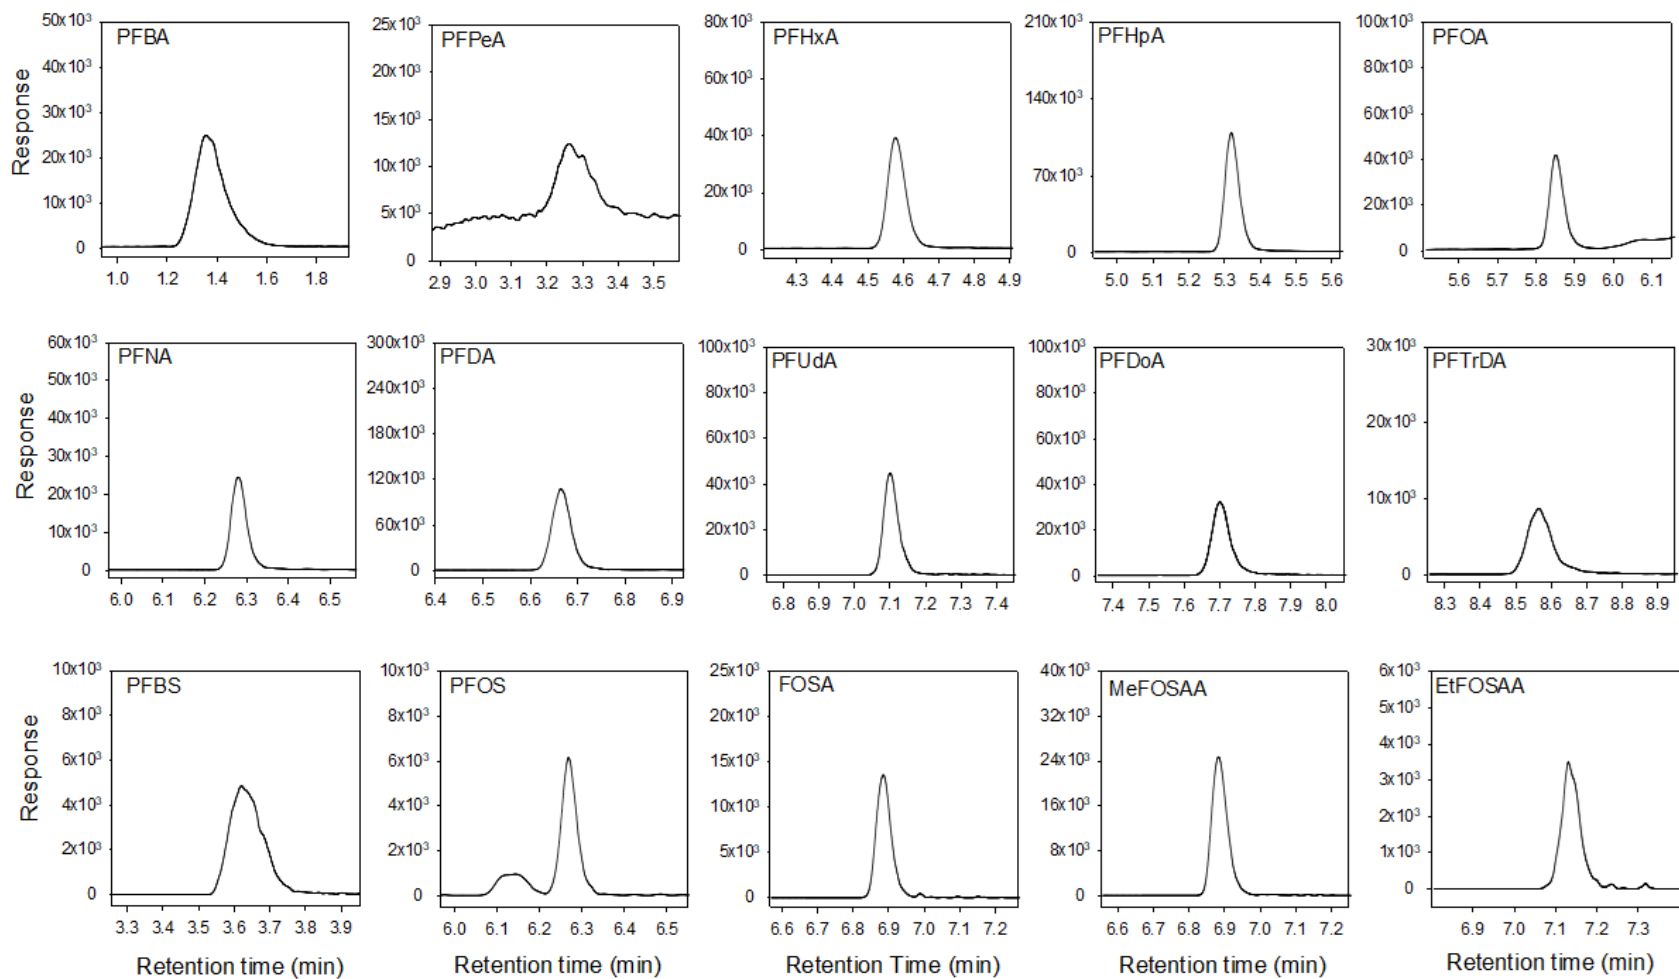

**Figure S5-E.** Chromatograms of all PFASs in the Biosolid 6 extract cleaned with ENVI-Carb (1000 mg), PSA (500 mg) and C18 (500 mg)

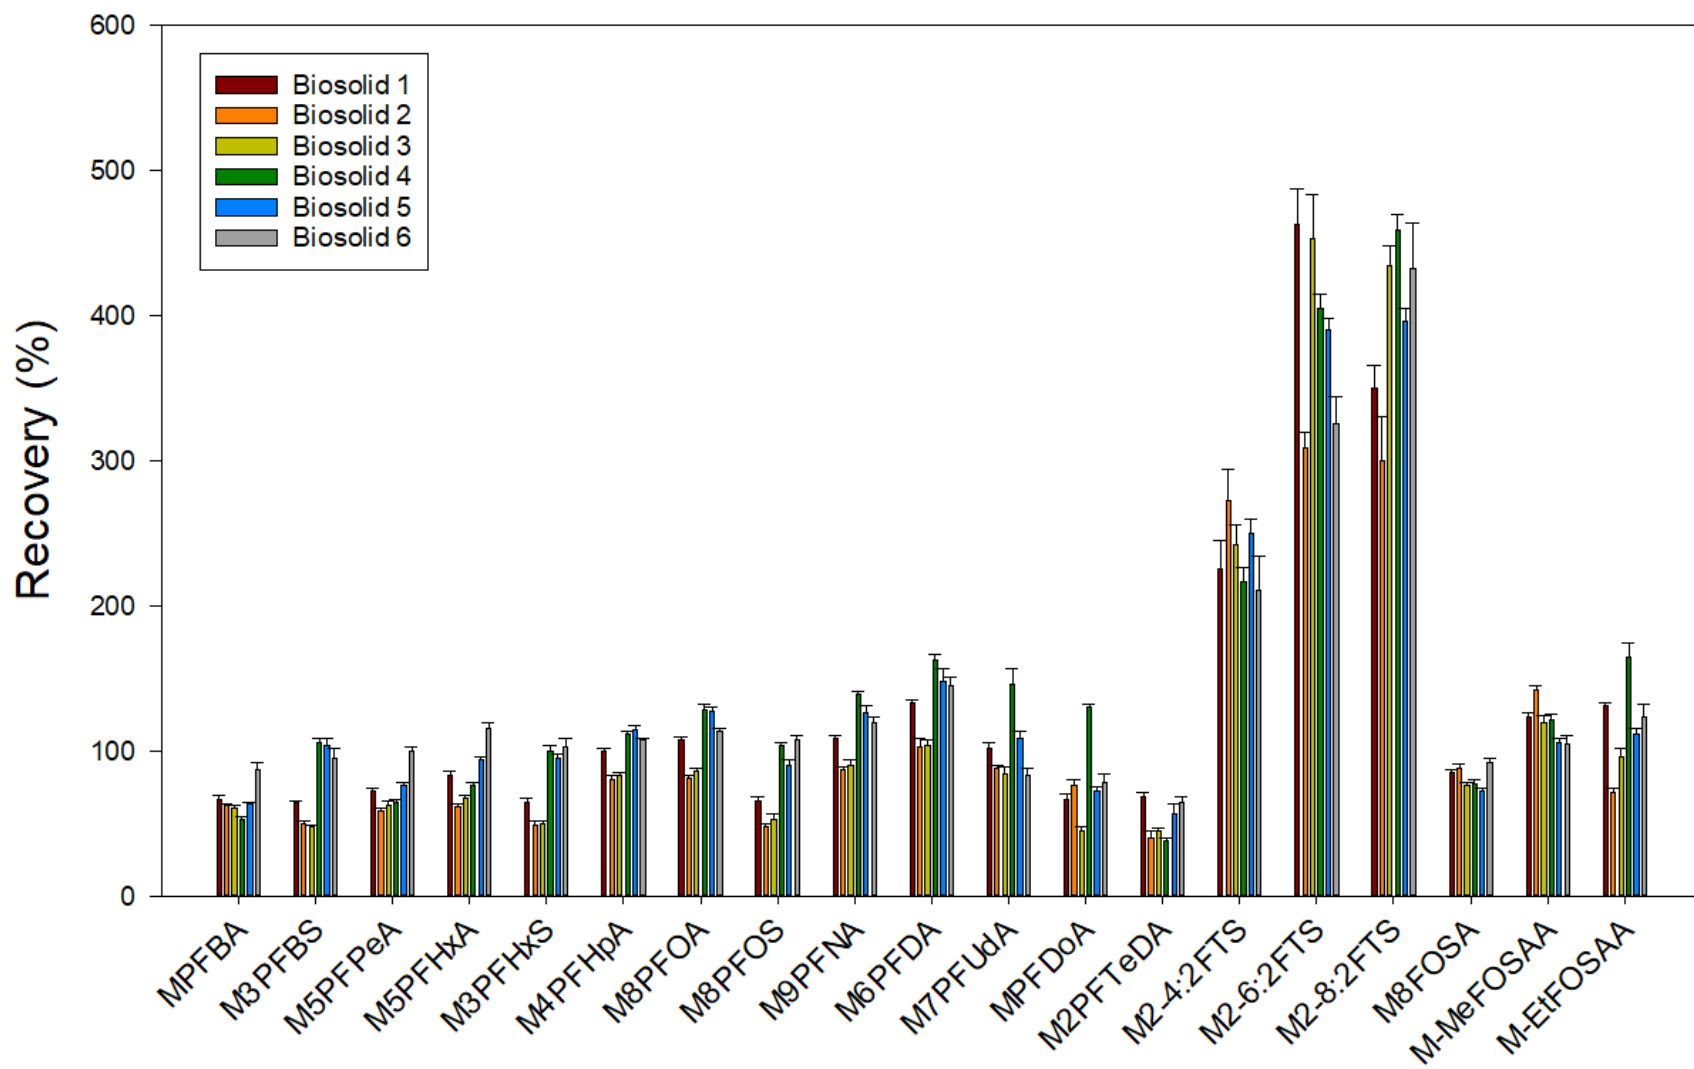

**Figure S6.** Mean Recovery Values (n=3) of mass-labelled PFAS of Biosolid 1, 2, 3, 4 and 5 cleaned with 1g ENVI-Carb + 0.5g PSA + 0.5g C18.
